# Supplementary material for: Effect of the protein environment on the excited state phenomena in a bacteriophytochrome
Source: Royal Society of Chemistry journal article supplement (doi:10.1039/d4cp02112f), 2024-01-01
Supplement: d4cp02112f1.pdf [file d4cp02112f1.pdf]

# Supporting Information for : Effect of protein environment on the excited state phenomena in bacteriophytochrome

Pradipta Dey†, Supriyo Santra† and Debashree Ghosh\*†

Email: pcdg@iacs.res.in

†School of Chemical Sciences, Indian Association for the Cultivation of Science, Jadavpur, Kolkata 700032, India

## S1 Orbitals included in the active space

The active space base calculation (CASSCF and CASPT2) are done using an active space of (6e,6o) with the 6-31G(d) basis set. The 6 orbitals of all the three important geometries (FC, CI<sub>1</sub>, CI<sub>2</sub>) are shown in the figures below. All the orbitals shown are the 3 state averaged CASSCF orbitals.

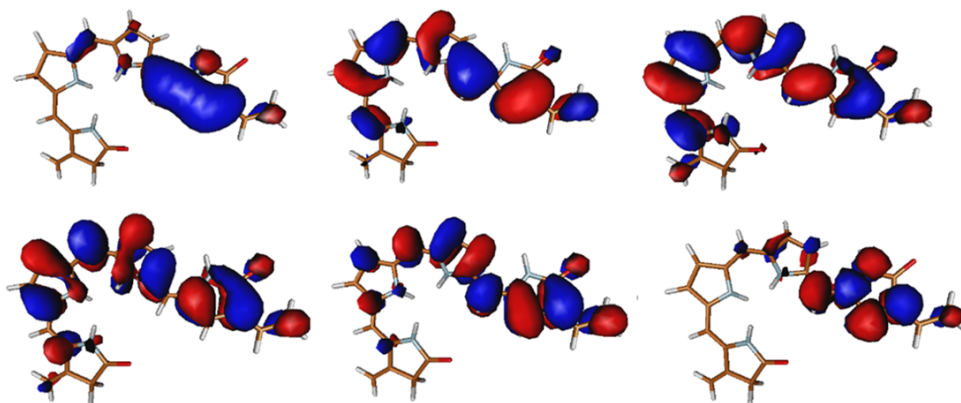

Figure S1: SA3-CASSCF orbitals at FC

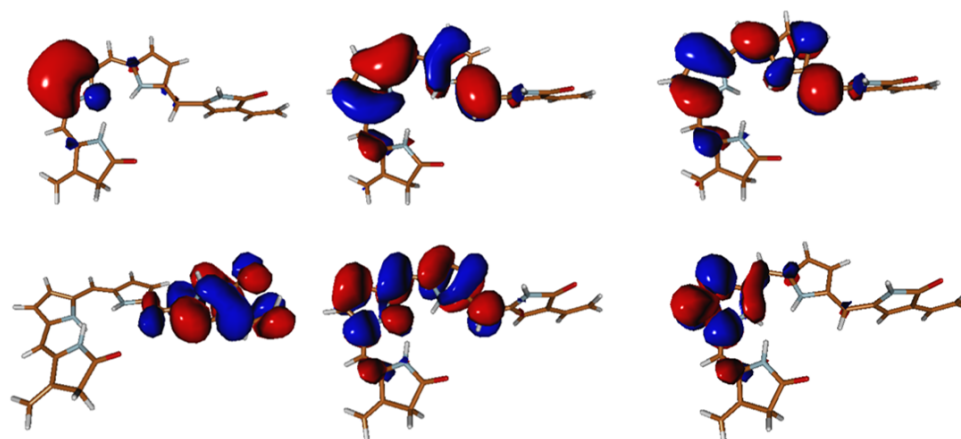

Figure S2: SA3-CASSCF orbitals at CI<sub>1</sub>

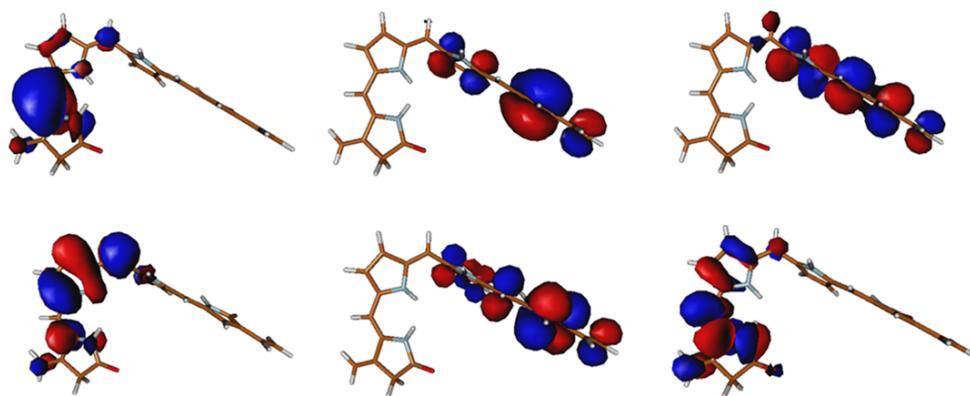

Figure S3: SA3-CASSCF orbitals at  $\text{Cl}_2$

## S2 Vertical excitation energy : Effect of basis set and functional

We have tested the effect of the excitation energy at the FC region with basis set and as well as with functional. Along with B3LYP, CAM-B3LYP functional is tested. For both the functional, along with 6-31G(d) basis set a more diffused basis set 6-311++G(d,p) is used. The following table shows that the vertical excitation energy does not change much with either the variation of the functional or the basis set. The  $S_1$  state always remain the bright state involving the HOMO  $\rightarrow$  LUMO transition. Given that both the HOMO and LUMO is of  $\pi$  nature extending the full chromophore this is unsurprising that the excitation energy change is minimal.

Table S1: The vertical excitation energies of the  $S_1$  and  $S_2$  states at the FC geometry. The excitatioin energies are reported in eV. The numbers in the brackets are the oscillator strengths.

| Excited state | B3LYP       |               | CAM-B3LYP   |               |
|---------------|-------------|---------------|-------------|---------------|
|               | 6-31G(d)    | 6-311++G(d,p) | 6-31G(d)    | 6-311++G(d,p) |
| $S_1$         | 1.99 (0.95) | 1.95(0.95)    | 2.10 (1.04) | 2.06 (1.02)   |
| $S_2$         | 2.47 (0.06) | 2.45 (0.07)   | 3.24(0.24)  | 3.21(0.29)    |

## S3 Charge transfer analysis at FC geometry

The Mulliken charges (in a.u.) calculated at B3LYP/6-31G(d) level of theory have been shown below in Fig. S4 (a). The attachment detachment density analysis has been shown in Fig. S4 (b).

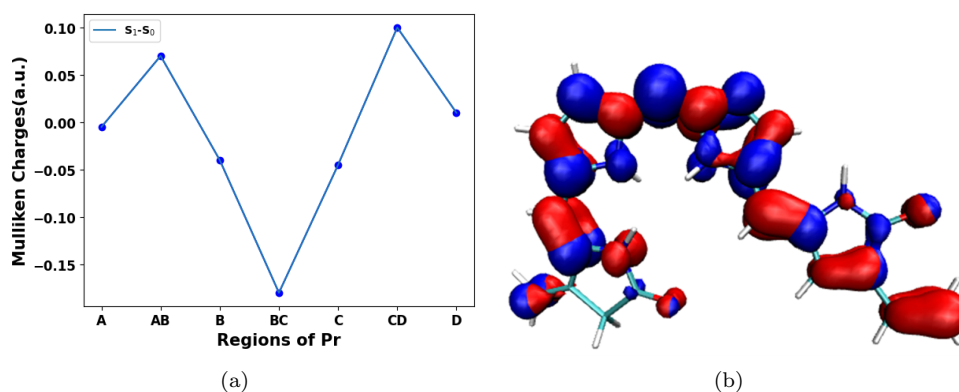

Figure S4: Charge analysis for FC geometry (a) Redistribution of Mulliken charges on excitation ( $S_1-S_0$ ) state (b) Optimized FC ; Blue : Attachment density, Red : Detachment density

## S4 Geometry of optimized $S_1$ -Min

The  $S_1$ -Min was obtained at TD-B3LYP/6-31g(d) level of theory. The same active space(6o,6e) is taken to calculate the excited states of  $S_1$ -Min geometry. CASPT2 calculations show comparable energies of the first bright state (1.65

eV) of the  $S_1$ -Min with that of the FC.  $S_1$ -Min is found to be a shallow minimum which lies very close to the FC geometry. Following figure is the geometry of  $S_1$ -Min along with its geometrical parameters.

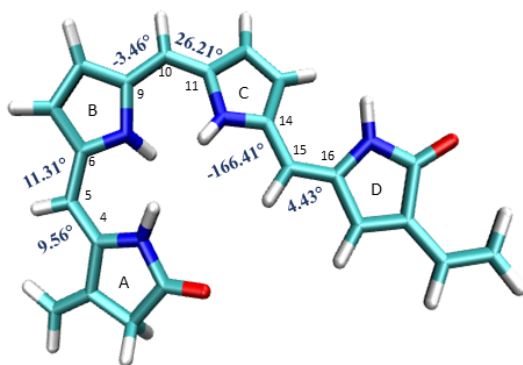

Figure S5: Geometrical parameters of FC, (a) Dihedral Angles  $\tau_{A-B}$ ,  $\tau_{B-A}$ ,  $\tau_{B-C}$ ,  $\tau_{C-B}$ ,  $\tau_{C-D}$  and  $\tau_{D-C}$  (in degrees)

## S5 Comparison of dihedral angles at several geometries

The dihedral angles for the different geometries are tabulated below. The major change in dihedral in  $CI_1$  with respect to the FC is that the D ring becomes perpendicular to the plane of the B and C rings. On the other hand the  $CI_2$  has a rotation about the methine bridge between the B and C rings and there for major change occurs at  $\tau_{C-B}$ .

Table S2: Dihedral angles at several geometries. The values are in degrees.

| Geometry   | $\tau_{A-B}$ | $\tau_{B-A}$ | $\tau_{B-C}$ | $\tau_{C-B}$ | $\tau_{C-D}$ | $\tau_{D-C}$ |
|------------|--------------|--------------|--------------|--------------|--------------|--------------|
| FC         | 7.13         | 15.21        | -9.30        | -10.50       | -165.66      | 4.72         |
| $S_1$ -Min | 9.56         | 11.31        | -3.46        | -26.21       | -166.41      | 4.43         |
| $CI_1$     | 3.87         | 28.52        | -12.07       | -3.19        | -179.89      | 90.64        |
| $CI_2$     | 4.84         | 21.38        | 0.19         | -90.74       | -172.98      | 5.80         |

## S6 Orbitals involved in the $S_1$ excitation near the $CI$ s

The orbitals involved in the  $S_1$  excitation for the two conical intersections. The direction of charge transfer is from B and C rings to the D ring for  $CI_1$  whereas for  $CI_2$ , it is the reverse i.e. from C and D ring to the A and B rings.

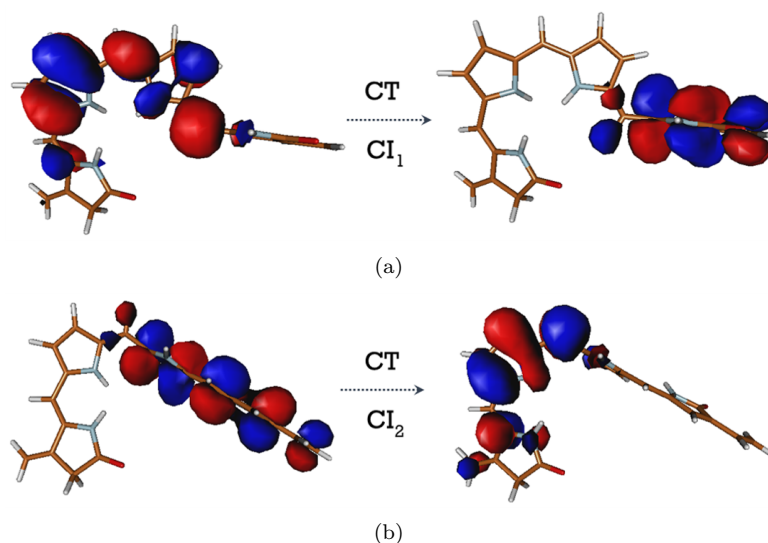

Figure S6: Orbitals involved in transition for  $S_1$  state for (a)  $CI_1$  and (b)  $CI_2$

## S7 Attachment detachment density analysis for CI<sub>1</sub> and CI<sub>2</sub>

The above finding of the CT character for the two CIs is also shown through the attachment and detachment density analysis for the two CIs.

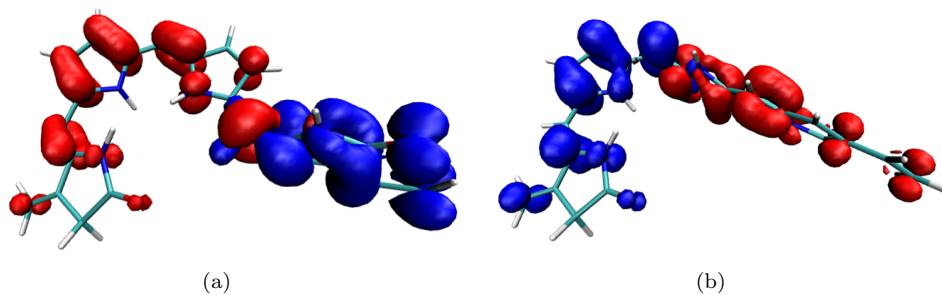

Figure S7: Attachment detachment density for (a) CI<sub>1</sub> and (b) CI<sub>2</sub> ; Blue : Attachment density, Red : Detachment density

## S8 The $\vec{g}$ and $\vec{h}$ vectors for CI<sub>1</sub> and CI<sub>2</sub>

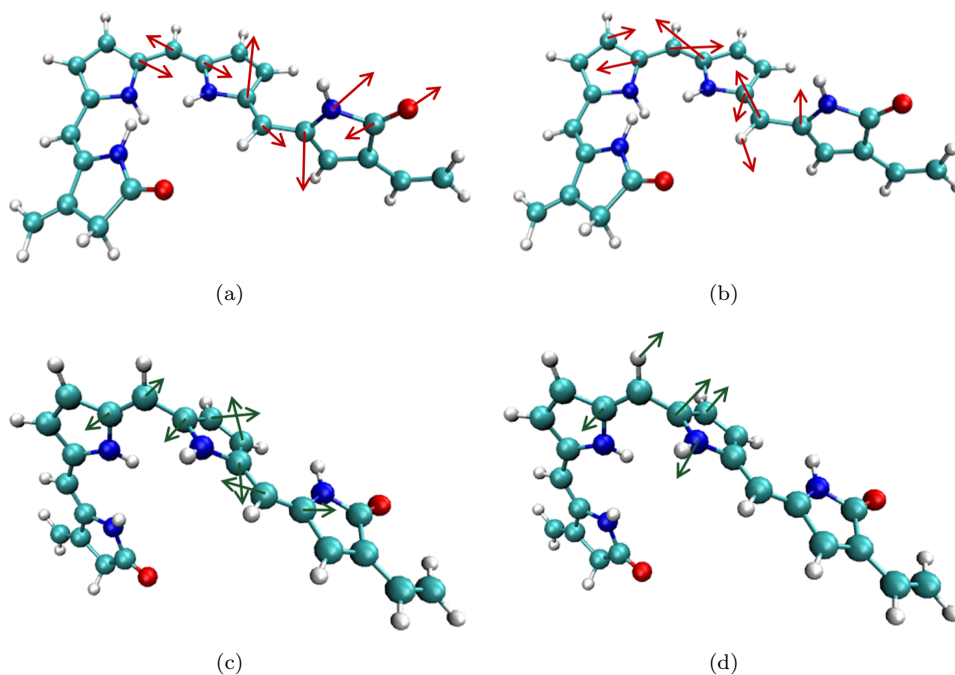

Figure S8: All the  $\vec{g}$  and  $\vec{h}$  vectors for the two conical intersections. 4(a) and 4(b) :  $\vec{g}$  and  $\vec{h}$  vectors of CI<sub>1</sub>. 4(c) and 4(d) :  $\vec{g}$  and  $\vec{h}$  vectors of CI<sub>2</sub>. The direction of arrows on different atoms refer to the direction of movement of the atoms for a particular vector.

## S9 Residues near the chromophore

To ascertain which of the residues play major role in modulating the stability of the chromophore at several important regions on the potential energy surface, EDA analysis has been done. The important residues are selected mainly near the C and D ring positions as major differences happen at either at the D ring (CI<sub>1</sub>) or at the CD ring (CI<sub>2</sub>) with respect to the FC geometry. The following figures show the position of the important residues in the protein relative to the chromophore.

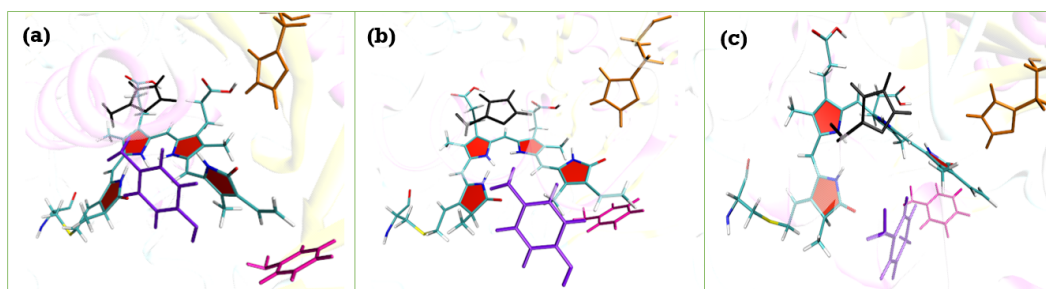

Figure S9: Chromophore with the important residues near the C and D ring inside the protein.(a) CI<sub>1</sub>, (b) FC and (c) CI<sub>2</sub>. Residue colour; black : HIS-260 , orange : HIS-290, violet : TYR-263 , pink : PHE-203. For clarity the chromophore pyrrole ring is shaded with the orange colour

## S10 EDA analysis

Energy decomposition analysis is done to ascertain the effect of important residues. All the components of energy are given in the following table. The explanation is included in the main manuscript (Result and discussion section)

Table S3: EDA for the important residues

| Residue | Energy component | CI-1          | FC            | CI-2          |
|---------|------------------|---------------|---------------|---------------|
| HIS-290 | Dispersion       | -2.30         | -3.93         | -15.04        |
|         | Polarisation     | -1.14         | -1.38         | -1.59         |
|         | Charge transfer  | -0.22         | -2.91         | -6.73         |
|         | <b>Total</b>     | <b>7.91</b>   | <b>8.18</b>   | <b>-6.03</b>  |
| TYR-263 | Dispersion       | -34.97        | -21.60        | -28.03        |
|         | Polarisation     | -5.01         | -1.42         | -1.41         |
|         | Charge transfer  | -17.95        | -8.37         | -10.40        |
|         | <b>Total</b>     | <b>-48.86</b> | <b>-21.45</b> | <b>-19.82</b> |
| HIS-260 | Dispersion       | -41.29        | -18.57        | -44.41        |
|         | Polarisation     | -4.33         | -3.53         | -10.13        |
|         | Charge transfer  | -20.73        | -8.33         | -22.86        |
|         | <b>Total</b>     | <b>-64.89</b> | <b>-34.97</b> | <b>-49.89</b> |
| PHE-203 | Dispersion       | -24.57        | -16.89        | -3.50         |
|         | Polarisation     | -3.00         | -0.80         | -0.44         |
|         | Charge transfer  | -11.20        | -4.54         | -0.32         |
|         | <b>Total</b>     | <b>-18.32</b> | <b>-12.22</b> | <b>-0.89</b>  |

## S11 Optimized geometries of FC, S<sub>1</sub>-Min, CI<sub>1</sub> and CI<sub>2</sub>

FC geometry optimized at B3LYP/6-31g(d) level of theory

|   |               |               |               |
|---|---------------|---------------|---------------|
| C | -1.8408855746 | -2.8176785591 | 0.1080497029  |
| C | -4.3281227649 | 0.7791903542  | 0.2515722864  |
| C | -0.5450073398 | 2.9652986816  | -0.1530189557 |
| C | 3.2359498334  | 0.0404351528  | -0.0157280381 |
| C | -2.8926043389 | -3.8450754485 | -0.2907968270 |
| C | -5.1166139640 | 1.8996127219  | 0.5992305545  |
| C | 0.5976741249  | 3.6782206944  | -0.6011483290 |
| C | 3.8536300341  | -1.2712746971 | 0.0728408705  |
| C | -4.1969356195 | -3.0638729771 | -0.3237665220 |
| C | -4.3105928792 | 3.0298656926  | 0.5582237782  |
| C | 1.6709014430  | 2.8058677329  | -0.6527352881 |
| C | 5.2098772646  | -1.1495721116 | 0.0731706869  |
| C | -3.8838218480 | -1.6575972745 | 0.0021669667  |
| C | -3.0007080025 | 2.6359562233  | 0.1997368921  |
| C | 1.2300380801  | 1.5279936400  | -0.2048582672 |
| C | 5.5173265350  | 0.3262892493  | 0.0097050764  |

|   |               |               |               |
|---|---------------|---------------|---------------|
| C | -5.4092852337 | -3.5508349891 | -0.6147926386 |
| C | 6.1974657031  | -2.2037531162 | 0.1258254780  |
| C | 7.5290107901  | -2.0120859165 | 0.1278040372  |
| C | -4.7252603207 | -0.5792094995 | 0.0813440826  |
| C | -1.8551970045 | 3.4133328770  | 0.0142660597  |
| C | 1.8823946431  | 0.2793853107  | -0.0234120192 |
| N | -2.5142028996 | -1.5967458378 | 0.2185760498  |
| O | -0.6538283752 | -2.9498027141 | 0.3090334933  |
| N | -3.0321121746 | 1.2364773728  | 0.0607004075  |
| N | -0.1180823737 | 1.6478421607  | 0.0428030696  |
| N | 4.2611281301  | 0.9591057455  | -0.0918622993 |
| O | 6.5757741894  | 0.9137456476  | 0.0440938114  |
| H | -6.2960961953 | -2.9247618475 | -0.6322745945 |
| H | -5.7917068471 | -0.7599628129 | 0.0116274286  |
| H | -2.6344359817 | -4.2860956624 | -1.2603613292 |
| H | -2.0736655202 | -0.8212210106 | 0.6939386741  |
| H | -2.4292579922 | 0.7872589825  | -0.6204605104 |
| H | -0.5993293838 | 1.0110304029  | 0.6620496764  |
| H | 4.1744778439  | 1.9562728309  | 0.0410691980  |
| H | -2.0029593480 | 4.4887718213  | -0.0156245337 |
| H | 1.2478973461  | -0.5923045588 | 0.1224260112  |
| H | 5.7980653626  | -3.2156797365 | 0.1672210584  |
| H | 8.2068412397  | -2.8588103226 | 0.1709671376  |
| H | 7.9634050064  | -1.0196669257 | 0.0886892126  |
| H | -4.6031882672 | 4.0431596028  | 0.8007603431  |
| H | 0.5917726789  | 4.7156805979  | -0.9088068429 |
| H | -5.5546861361 | -4.6018486687 | -0.8443348788 |
| H | -2.8933359824 | -4.6600396833 | 0.4420185579  |
| H | -6.1636196772 | 1.8570544557  | 0.8663803036  |
| H | 2.6550035152  | 3.0336696784  | -1.0359259773 |
| H | 3.2790403954  | -2.1888616806 | 0.1075166939  |

**S<sub>1</sub>-Min optimized geometry at TD-B3LYP/6-31g(d) level of theory**

|   |               |               |               |
|---|---------------|---------------|---------------|
| C | -1.5490195618 | -2.6105187865 | 0.1065260083  |
| C | -4.2757659812 | 0.7928994043  | 0.2104584885  |
| C | -0.5959448255 | 3.0554476047  | -0.1228511919 |
| C | 3.0926446031  | -0.0029175688 | 0.0936003527  |
| C | -2.5206507916 | -3.7064070763 | -0.3125881559 |
| C | -5.1423524507 | 1.8849607996  | 0.5496758742  |
| C | 0.4723525202  | 3.6499984237  | -0.7962850088 |
| C | 3.6343200729  | -1.3297967645 | 0.2703647026  |
| C | -3.8711476781 | -3.0074666876 | -0.3925350063 |
| C | -4.4047697699 | 3.0402478191  | 0.5883985304  |
| C | 1.5492450000  | 2.7349861945  | -0.8026629366 |
| C | 5.0019948139  | -1.2900035688 | 0.1553052264  |
| C | -3.6604958290 | -1.6008958427 | -0.0466657741 |
| C | -3.0346786994 | 2.7253552691  | 0.2672250246  |
| C | 1.1444675898  | 1.5816075654  | -0.1245973291 |
| C | 5.3834527723  | 0.1484793268  | -0.0879275407 |
| C | -5.0405811147 | -3.5725733283 | -0.7395723785 |
| C | 5.9157801142  | -2.3943951396 | 0.2539722718  |
| C | 7.2626576334  | -2.2983066953 | 0.1338094693  |
| C | -4.5849658921 | -0.5640810785 | 0.0395353476  |
| C | -1.9373424183 | 3.5337996010  | 0.1358502123  |
| C | 1.7591541350  | 0.3101860330  | 0.1436654364  |
| N | -2.3112260202 | -1.4483517525 | 0.2154935463  |
| O | -0.3545269470 | -2.6564995059 | 0.3248434238  |
| N | -2.9906179846 | 1.3199076947  | 0.0929486881  |
| N | -0.1789141918 | 1.7854713173  | 0.2486699444  |

|   |               |               |               |
|---|---------------|---------------|---------------|
| N | 4.1673836863  | 0.8407630723  | -0.1429370212 |
| O | 6.4824881706  | 0.6522892920  | -0.2096841771 |
| H | -5.9640642790 | -3.0045225335 | -0.7929970583 |
| H | -5.6361740587 | -0.8234334471 | -0.0162503542 |
| H | -2.2062071770 | -4.1397445910 | -1.2688486833 |
| H | -1.9220763376 | -0.6112419721 | 0.6273440151  |
| H | -2.3632749498 | 0.9583670973  | -0.6184985568 |
| H | -0.6045614253 | 1.2881022534  | 1.0197978637  |
| H | 4.1335217915  | 1.8500676079  | -0.1560536408 |
| H | -2.0848372678 | 4.6077085947  | 0.1830897969  |
| H | 1.0941095861  | -0.5165334515 | 0.3900455117  |
| H | 5.4643021475  | -3.3677957103 | 0.4393329372  |
| H | 7.8868498132  | -3.1820677727 | 0.2208547906  |
| H | 7.7483423981  | -1.3461364459 | -0.0487288186 |
| H | -4.7570854173 | 4.0299633898  | 0.8476914567  |
| H | 0.4497047799  | 4.6212847580  | -1.2711603146 |
| H | -5.1064308532 | -4.6287084806 | -0.9812607730 |
| H | -2.4957183726 | -4.5138050569 | 0.4286562007  |
| H | -6.1969930219 | 1.7792750386  | 0.7676688475  |
| H | 2.4870973761  | 2.8688519382  | -1.3235170553 |
| H | 3.0153015568  | -2.2029354751 | 0.4407410721  |

CI<sub>1</sub> optimized geometry at CASSCF/6-31g(d) level of theory with an active space (6,6)

|   |               |               |               |
|---|---------------|---------------|---------------|
| C | 2.2882758174  | -1.9887737624 | -0.1797048992 |
| C | 3.6684700454  | 2.0911267318  | -0.3040654170 |
| C | -0.5720590557 | 3.0143121713  | 0.2178429134  |
| C | -3.5327338654 | -0.6350510547 | 0.6726545232  |
| C | 3.5298304062  | -2.7134450460 | 0.2970747154  |
| C | 4.0251284999  | 3.3142314669  | -0.8350781639 |
| C | -1.9356397611 | 3.4229644028  | 0.4830117718  |
| C | -4.1593431364 | -1.0106647728 | 1.8973782055  |
| C | 4.6060364296  | -1.6418120971 | 0.3159523990  |
| C | 2.8888282659  | 4.1584442766  | -0.7955122577 |
| C | -2.6973195148 | 2.3325093025  | 0.6389122402  |
| C | -5.4131820806 | -1.4613359237 | 1.6394947162  |
| C | 3.9523298036  | -0.3530811006 | -0.0445255398 |
| C | 1.8354804600  | 3.4249337035  | -0.2406544852 |
| C | -1.8524024182 | 1.1534412597  | 0.4612282265  |
| C | -5.6053529957 | -1.3715876067 | 0.1496877396  |
| C | 5.8819797460  | -1.8204002669 | 0.5978553483  |
| C | -6.3962404215 | -1.9385549895 | 2.5879854906  |
| C | -7.6134520868 | -2.3716333186 | 2.2705046575  |
| C | 4.4521481779  | 0.8823362791  | -0.0549877934 |
| C | 0.4885783437  | 3.8230700681  | -0.0327236400 |
| C | -2.1735476832 | -0.1496460451 | 0.4641452934  |
| N | 2.6284087322  | -0.6758134706 | -0.3451204793 |
| O | 1.1957539381  | -2.4281486423 | -0.3769029296 |
| N | 2.3056947552  | 2.1495721289  | 0.0209260223  |
| N | -0.5812241064 | 1.6345804334  | 0.2638471401  |
| N | -4.3934884776 | -0.8465430026 | -0.3310693888 |
| O | -6.5300199960 | -1.6516240520 | -0.5309037014 |
| H | 6.5896802916  | -1.0124694023 | 0.5897140913  |
| H | 5.4973041243  | 1.0199621985  | 0.1424905705  |
| H | 3.3461525300  | -3.1429068558 | 1.2756277717  |
| H | 2.0305344963  | -0.0569726513 | -0.8419764454 |
| H | 2.0070256657  | 1.6815211765  | 0.8515995754  |
| H | 0.1455139485  | 1.0716678318  | -0.1113201047 |
| H | -4.2064777326 | -0.7041059361 | -1.3003356695 |
| H | 0.2862312786  | 4.8754145269  | -0.1028144929 |

|   |               |               |               |
|---|---------------|---------------|---------------|
| H | -1.4102441046 | -0.8991660433 | 0.3171886954  |
| H | -6.0827712601 | -1.9303833184 | 3.6169718388  |
| H | -8.2816104882 | -2.7117191308 | 3.0391781658  |
| H | -7.9710491912 | -2.4006982584 | 1.2603663481  |
| H | 2.8190690577  | 5.1606072927  | -1.1659207989 |
| H | -2.2488893228 | 4.4450744185  | 0.5529337568  |
| H | 6.2668676920  | -2.7927985924 | 0.8451042929  |
| H | 3.7488912250  | -3.5276120718 | -0.3836882646 |
| H | 4.9874899214  | 3.5641288676  | -1.2317171921 |
| H | -3.7448036560 | 2.2997164145  | 0.8574992742  |
| H | -3.6785284075 | -0.9369387886 | 2.8507182195  |

Cl<sub>2</sub> optimized geometry at CASSCF/6-31g(d) level of theory with an active space (6,6)

|   |               |               |               |
|---|---------------|---------------|---------------|
| C | -2.4382047537 | -3.0408741368 | -0.1954061325 |
| C | -4.4087981907 | 0.8549019589  | 0.1549947723  |
| C | -0.4481270209 | 2.5671726096  | 0.0861602216  |
| C | 3.6885264993  | 0.3106652213  | 0.5064671192  |
| C | -3.5450145706 | -3.8454565289 | -0.8431590222 |
| C | -5.0931133368 | 1.9451773815  | 0.6853802664  |
| C | 0.1608744585  | 2.5285314841  | -1.1889205882 |
| C | 4.5994600975  | -0.5656420062 | 1.2456774877  |
| C | -4.7170045957 | -2.8862480344 | -0.9116977794 |
| C | -4.1846627125 | 2.9580226683  | 0.9109810510  |
| C | 1.3450702502  | 1.8518786553  | -1.0732999499 |
| C | 5.7370567778  | -0.7620090936 | 0.5150050926  |
| C | -4.2439166270 | -1.5764582387 | -0.3890067246 |
| C | -2.9019464145 | 2.5036595239  | 0.5012698631  |
| C | 1.4940544402  | 1.4565878928  | 0.2874914674  |
| C | 5.5788596791  | 0.0421205037  | -0.7438068430 |
| C | -5.9252932768 | -3.1609563166 | -1.3645653479 |
| C | 6.8940684428  | -1.5883755438 | 0.8651042567  |
| C | 7.9722736265  | -1.7443093944 | 0.1170717712  |
| C | -4.9401061544 | -0.4214520630 | -0.2604307172 |
| C | -1.7104428951 | 3.1697544355  | 0.5218406682  |
| C | 2.4677469910  | 0.7133182106  | 0.9747590247  |
| N | -2.8995207801 | -1.7522556319 | -0.0472364882 |
| O | -1.3595438330 | -3.4079347479 | 0.1452194277  |
| N | -3.0839744859 | 1.1945610208  | 0.0801003263  |
| N | 0.3738223016  | 1.9110235407  | 0.9295100322  |
| N | 4.2954578907  | 0.6096297442  | -0.6661384537 |
| O | 6.3201327276  | 0.2224320465  | -1.6433959925 |
| H | -6.7101085574 | -2.4282980018 | -1.3960664492 |
| H | -5.9918404229 | -0.4394197468 | -0.4685078699 |
| H | -3.2222151163 | -4.1839144579 | -1.8214575998 |
| H | -2.4203581056 | -1.1475569480 | 0.5818984520  |
| H | -2.4544640157 | 0.7331262941  | -0.5377496004 |
| H | 0.1952091952  | 1.8141523288  | 1.9058044976  |
| H | 4.0258710203  | 1.3224715367  | -1.3046751851 |
| H | -1.6850425797 | 4.1935513164  | 0.8459880401  |
| H | 2.2319175877  | 0.4145506499  | 1.9788163963  |
| H | 6.8196861171  | -2.0911768842 | 1.8136061678  |
| H | 8.7757583109  | -2.3722182929 | 0.4542726048  |
| H | 8.0925408728  | -1.2643932281 | -0.8342730976 |
| H | -4.3791796184 | 3.9218565610  | 1.3339865185  |
| H | -0.2605829653 | 2.9589643642  | -2.0731427744 |
| H | -6.1738160309 | -4.1428870173 | -1.7233644685 |
| H | -3.7441187682 | -4.7231829286 | -0.2400833573 |
| H | -6.1421477148 | 1.9631745770  | 0.8984568254  |



|   |              |               |               |
|---|--------------|---------------|---------------|
| H | 2.0134558306 | 1.6133219181  | -1.8719832302 |
| H | 4.3564476701 | -0.9887058388 | 2.1984485853  |
